# Supplementary material for: The Tumor-Specific Expression of L1 Retrotransposons Independently Correlates with Time to Relapse in Hormone-Negative Breast Cancer Patients
Source: MDPI journal article supplement (doi:10.3390/cells11121944), 2022-06-16
Supplement: s1 [file s1]

Supplementary Materials

# The Tumor-Specific Expression of L1 Retrotransposons Independently Correlates with Time to Relapse in Hormone-Negative Breast Cancer Patients

Enrico Berrino <sup>1,2,†</sup>, Umberto Miglio <sup>1,†</sup>, Sara Erika Bellomo <sup>1,3</sup>, Carla Debernardi <sup>2</sup>, Alberto Bragioni <sup>1,2</sup>, Annalisa Petrelli <sup>1</sup>, Eliano Cascardi <sup>1,2</sup>, Silvia Giordano <sup>1,3</sup>, Filippo Montemurro <sup>1</sup>, Caterina Marchiò <sup>1,2</sup>, Tiziana Venesio <sup>1,\*</sup> and Anna Sapino <sup>1,2</sup>

<sup>1</sup> Candiolo Cancer Institute, FPO-IRCCS, 10060 Candiolo, Italy; enrico.berrino@ircc.it (E.B.); umberto.miglio@ircc.it (U.M.); saraerika.bellomo@unito.it (S.E.B.); alberto.bragioni@ircc.it (A.B.); annalisa.petrelli@unito.it (A.P.); eliano.cascardi@ircc.it (E.C.); silvia.giordano@unito.it (S.G.); filippo.montemurro@ircc.it (F.M.); caterina.marchio@unito.it (C.M.); anna.sapino@unito.it (A.S.)

<sup>2</sup> Department of Medical Sciences, University of Turin, 10124 Turin, Italy; carla.debernardi@unito.it

<sup>3</sup> Department of Oncology, University of Turin, 10124 Turin, Italy

\* Correspondence: tiziana.venesio@ircc.it; Tel.: +39-011-9933547; Fax: +39-011-9933480

† These authors contributed equally to this work.

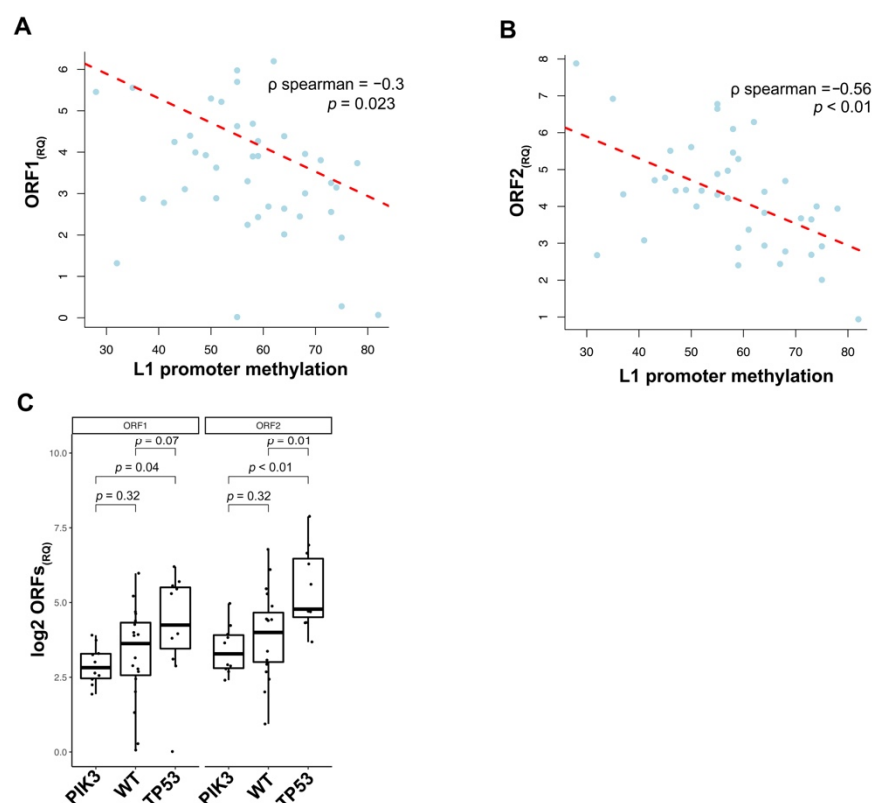

**Figure S1.** (A) Correlation plot for ORF1 and methylation levels in the 41 BC tumors. (B) Correlation plot for ORF2 and methylation levels in the 41 BC tumors. (C) Boxplot reporting the expression of both ORF1 and ORF2 in *PIK3CA/AKT* mutated, WT or *TP53* mutated BCs ( $n = 41$ ).

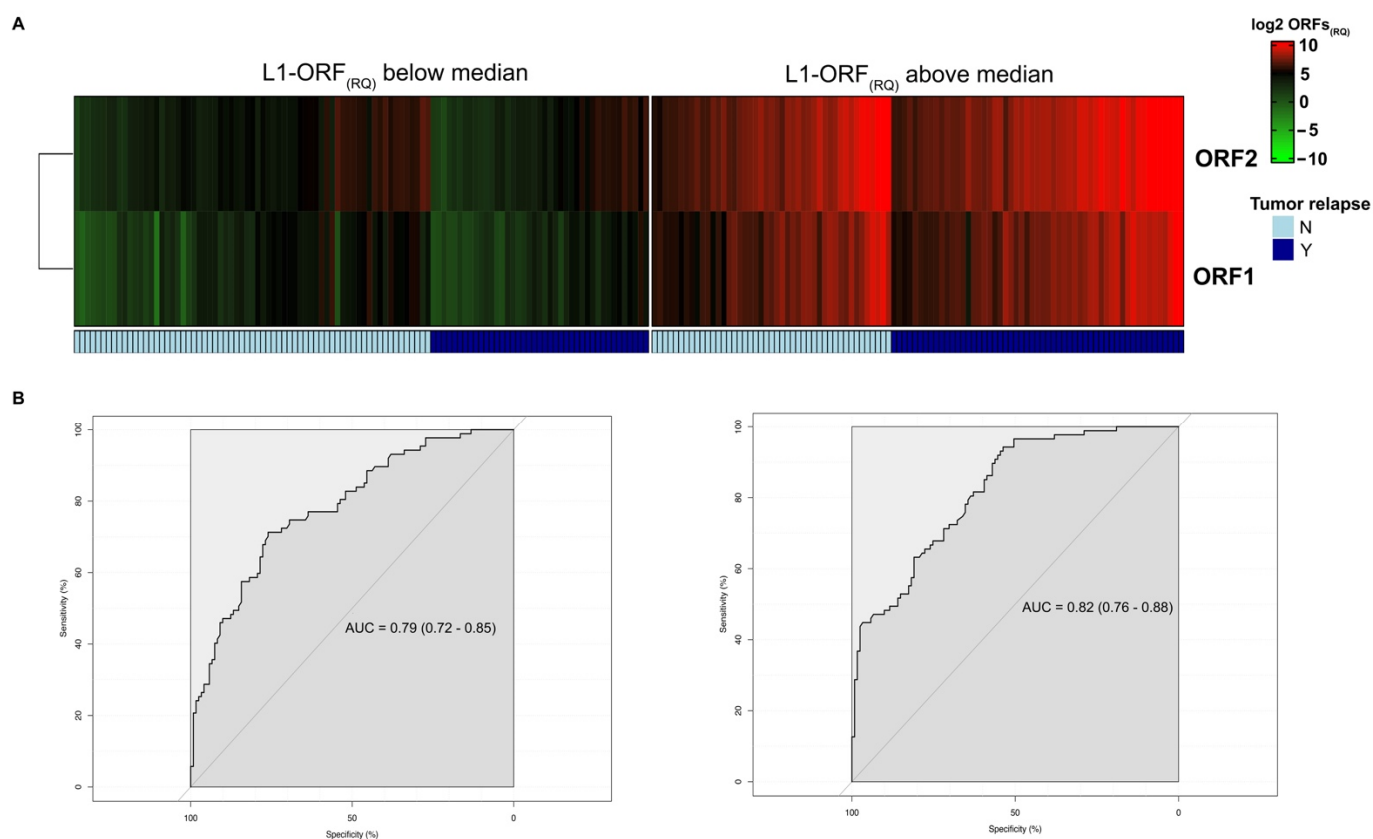

**Figure S2. (A)** Heatmap of ORF1<sub>(RQ)</sub> and ORF2<sub>(RQ)</sub> within BC, with recurrence (N = light blue, Y = dark blue) annotation, clustered for the median level (above or below). Green-to-red scale for the log2 expression revealed a sensible increased expression in patients with tumor relapse. **(B)** Patient relapse ROC curves for both ORF1 and ORF. Plots also reporting the area under the curve (AUC) with range.

**Table S1.** BC cell lines analyzed in the study.

| Cell Line | PAM50           | Histology        | ER | PR | HER2 | Metastatic Potential | ORF1 (dCT) | ORF2(dCT) | L1(dCT) |
|-----------|-----------------|------------------|----|----|------|----------------------|------------|-----------|---------|
| Invasive  |                 |                  |    |    |      |                      |            |           |         |
| BT474     | Luminal B       | Ductal Carcinoma | +  | +  | +    | 1                    | 0.29       | 0.09      | 0.19    |
| BT549     | Basal-like      | Adenocarcinoma   | -  | -  | -    | 3                    | 0.55       | 0.39      | 0.47    |
| HCC1187   | Basal-like      | Ductal Carcinoma | -  | -  | -    | 2                    | 2.54       | 1.83      | 2.185   |
| HCC70     | Basal-like      | Ductal Carcinoma | -  | -  | -    | 2                    | 0.44       | 0.31      | 0.375   |
| HMEC      | Non transformed | Human Mammary    | na | na | na   | 0                    | 0.05       | 0.03      | 0.04    |

|                |                        | Epitheli<br>al Cell                     |    |     |    |   |      |      |       |  |
|----------------|------------------------|-----------------------------------------|----|-----|----|---|------|------|-------|--|
|                |                        | Invasiv<br>e                            |    |     |    |   |      |      |       |  |
| HS578T         | Basal-<br>like         | Ductal<br>Carcino<br>ma                 | -  | -   | -  | 3 | 1.42 | 0.88 | 1.15  |  |
| MCF-7          | Luminal<br>A           | Ductal<br>Carcino<br>ma                 | +  | +   | -  | 1 | 0.54 | 0.41 | 0.475 |  |
| MCF10A         | Non<br>transfor<br>med | Fibrocy<br>stic<br>disease              | na | na  | na | 0 | 0.09 | 0.14 | 0.115 |  |
| MDA-MB<br>231  | Basal-<br>like         | Adenoc<br>arcino<br>ma                  | -  | -   | -  | 1 | 0.59 | 0.31 | 0.45  |  |
| MDA-MB<br>453  | HER2                   | Adenoc<br>arcino<br>ma                  | -  | -   | +  | 3 | 1.04 | 0.91 | 0.975 |  |
| MDA-MB-<br>468 | Basal-<br>like         | Ductal<br>Carcino<br>ma                 | -  | -   | -  | 1 | 1.62 | 0.89 | 1.255 |  |
| SKBR3          | HER2                   | Adenoc<br>arcino<br>ma                  | -  | -   | +  | 1 | 0.25 | 0.11 | 0.18  |  |
| T47D           | Luminal<br>A           | Invasiv<br>e<br>Ductal<br>Carcino<br>ma | +  | +   | -  | 1 | 0.47 | 0.4  | 0.435 |  |
| ZR751          | Luminal<br>A           | Invasiv<br>e<br>Ductal<br>Carcino<br>ma | +  | +/- | -  | 1 | 0.09 | 0.03 | 0.06  |  |

**Table S2.** BC cohort features.

|                                         |                   |
|-----------------------------------------|-------------------|
| Age ( <i>n</i> = 210)                   | Mean              |
|                                         | 58 (range 30-89)  |
| Ki67 ( <i>n</i> = 210)                  | Mean (%)          |
|                                         | 38.5 (range 3-95) |
| TILs ( <i>n</i> = 210)                  | Mean (%)          |
|                                         | 10 (range 2-60)   |
| Tumor Size ( <i>n</i> = 210)            | Mean (mm)         |
|                                         | 26.5 (range 2-90) |
| Histotype ( <i>n</i> = 210)             | # Patients (%)    |
| Lobular                                 | 16 (7.5%)         |
| Ductal                                  | 171 (81.5%)       |
| Other                                   | 23 (11%)          |
| Grading ( <i>n</i> = 210)               |                   |
| G1                                      | 5 (2.5%)          |
| G2                                      | 64 (30.5%)        |
| G3                                      | 141 (67%)         |
| Staging ( <i>n</i> = 210)               |                   |
| pT1                                     | 69 (33%)          |
| pT2                                     | 116 (55%)         |
| pT3                                     | 17 (8%)           |
| pT4                                     | 8 (4%)            |
| Lymph node metastases ( <i>n</i> = 210) |                   |
| pN0                                     | 69 (33%)          |
| pN1                                     | 114 (54%)         |
| pN2                                     | 14 (6.5%)         |
| pN3                                     | 13 (6%)           |
| Molecular subtype ( <i>n</i> = 210)     |                   |
| Luminal A                               | 67 (32%)          |
| Luminal B                               | 51 (24%)          |
| HER2                                    | 52 (25%)          |
| Basal-like                              | 40 (19%)          |
| Recurrence ( <i>n</i> = 210)            |                   |
| Yes                                     | 112 (53%)         |
| No                                      | 96 (46%)          |
| Unknown                                 | 2 (1%)            |
| Treatment ( <i>n</i> = 209)             |                   |
| Chemotherapy                            | 160 (76%)         |
| Radiotherapy                            | 157 (75%)         |
| Hormone therapy                         | 156 (74%)         |
| Anti-HER2 therapy                       | 48 (23%)          |
| Relapse ( <i>n</i> = 208)               |                   |
| Yes                                     | 96 (46%)          |
| No                                      | 112 (54%)         |

**Table S3.** Primers, thermal profiles and protocols for L1 analysis.

| qRT-PCR and Methylation Primers |                                  |
|---------------------------------|----------------------------------|
|                                 | 5'-GGC CAA CGT TCA GAT TCA GG-3' |
| ORF1-R                          | 5'-AAC CCG ACC TTT CTC TCT GG-3' |
| ORF1-RA                         | 5'-AAC CCG ACC TTT CTC TCT GG-3' |
| ORFA-FA                         | 5'-GGC CAA CGT TCA GAT TCA GG-3' |
| GAPDH-F                         | 5'-GAA GGT GAA GGT CGG AGT C-3'  |
| GAPDH-R                         | 5'-GAA GAT GGT GAT GGG ATT TC-3' |
| 18S-F                           | 5'-AGTCCCTGCCCTTTGTACACA-3'      |

|                                |                                          |           |                   |
|--------------------------------|------------------------------------------|-----------|-------------------|
| 18S-R                          | 5'-GATCCGAGGGCCTCACTAAAC-3'              |           |                   |
| L1 methylation-F               | 5'-GAGTTAGGTGTGGGATATAGT-3'              |           |                   |
| L1 methylation-R               | 5'biotin-CAAAAAATCAAAAAA<br>TTCCCTTTC-3' |           |                   |
| L1 methylation sequencing      | 5'-GGTGTGGGATATAGTT-3'.                  |           |                   |
| L1-ORF1                        | Concentration                            |           | 95°C (3 minutes)  |
| cDNA                           | 50 ng                                    |           | 95°C (3 minutes)  |
| H2O                            | to 25 ul                                 |           | 95°C (30 seconds) |
| MgCl2                          | 3mM                                      | 30 cycles | 63°C (30 seconds) |
| dNTPs                          | 0,2mM                                    |           | 72°C (45 seconds) |
| Buffer                         | 1x                                       |           | 72°C (5 minutes)  |
| PF                             | 0,4 uM                                   |           |                   |
| PR                             | 0,4 uM                                   |           |                   |
| TakaraTaq                      | 1U                                       |           |                   |
| EvaGreen                       | 2X                                       |           |                   |
| L1-ORF2                        | Concentration                            |           | 95°C (3 minutes)  |
| cDNA                           | 50 ng                                    |           | 95°C (3 minutes)  |
| H2O                            | to 25 ul                                 | 30 cycles | 95°C (30 seconds) |
| MgCl2                          | 3mM                                      |           | 60°C (30 seconds) |
| dNTPs                          | 0,2mM                                    |           | 72°C (45 seconds) |
| Buffer                         | 1x                                       |           | 72°C (5 minutes)  |
| PF                             | 0,4 uM                                   |           |                   |
| PR                             | 0,4 uM                                   |           |                   |
| TakaraTaq                      | 1U                                       |           |                   |
| EvaGreen                       | 2X                                       |           |                   |
| 18S                            | Concentration                            |           | 95°C (3 minutes)  |
| cDNA                           | 50 ng                                    |           | 95°C (3 minutes)  |
| H2O                            | to 25 ul                                 |           | 95°C (30 seconds) |
| MgCl2                          | 2mM                                      | 25 cycles | 58°C (30 seconds) |
| dNTPs                          | 0,2mM                                    |           | 72°C (45 seconds) |
| Buffer                         | 1x                                       |           | 72°C (5 minutes)  |
| PF                             | 0,4 uM                                   |           |                   |
| PR                             | 0,4 uM                                   |           |                   |
| TakaraTaq                      | 1U                                       |           |                   |
| EvaGreen                       | 2X                                       |           |                   |
| GAPDH                          | Concentration                            |           | 95°C (3 minutes)  |
| cDNA                           | 50 ng                                    |           | 95°C (3 minutes)  |
| H2O                            | to 25 ul                                 |           | 95°C (30 seconds) |
| MgCl2                          | 2mM                                      | 30 cycles | 58°C (30 seconds) |
| dNTPs                          | 0,2mM                                    |           | 72°C (45 seconds) |
| Buffer                         | 1x                                       |           | 72°C (5 minutes)  |
| PF                             | 0,4 uM                                   |           |                   |
| PR                             | 0,4 uM                                   |           |                   |
| TakaraTaq                      | 1U                                       |           |                   |
| EvaGreen                       | 2X                                       |           |                   |
| <b>L1-promoter methylation</b> |                                          |           |                   |

| Concentration     |          |                             |
|-------------------|----------|-----------------------------|
| Coverted DNA      | 50 ng    | 95°C (3 minutes)            |
| H2O               | to 25 ul | 95°C (25 seconds)           |
| MgCl <sub>2</sub> | 3mM      | 40 cycles 50°C (25 seconds) |
| dNTPs             | 0.2 mM   | 72°C (25 seconds)           |
| Buffer            | 1x       | 72°C (5 minutes)            |
| PF                | 0,4 uM   |                             |
| PR                | 0,4 uM   |                             |
| GoTaq             | 1.25U    |                             |
| EvaGreen          | 2X       |                             |

**Table S4.** Mutation identified in the 41 BC patients.

| Patient ID | Mutated Gene | Coding Mutation   | Protein Mutation |
|------------|--------------|-------------------|------------------|
| 1          | PIK3CA       | c.1035T>A         | p.N345K          |
| 2          | TP53         | c.574C>T/743G>A   | p.Q192*/p.R248Q  |
| 3          | WT           | /                 | /                |
| 4          | PIK3CA       | c.3140A>G         | p.H1047R         |
| 5          | PIK3CA       | c.1637A>C         | p.Q546P          |
| 6          | PIK3CA       | c.3140A>T         | p.H1047L         |
| 7          | AKT          | c.49G>A           | p.E17K           |
| 8          | PIK3CA       | c.1634A>G         | p.E545G          |
| 9          | PIK3CA       | c.3140A>T         | p.H1047L         |
| 10         | TP53         | c.818G>A          | p.R273H          |
| 11         | WT           | /                 | /                |
| 12         | TP53         | c.586C>T          | p.R196Ter        |
| 13         | WT           | /                 | /                |
| 14         | AKT          | c.49G>A           | p.E17K           |
| 15         | WT           | /                 | /                |
| 16         | WT           | /                 | /                |
| 17         | WT           | /                 | /                |
| 18         | TP53         | c.578A>G          | p.H193r          |
| 19         | PIK3CA       | c.1634A>G         | p.E545G          |
| 20         | WT           | /                 | /                |
| 21         | PIK3CA       | c.3140A>G         | p.H1047R         |
| 22         | WT           | /                 | /                |
| 23         | TP53         | c.711G>A          | p.M237I          |
| 24         | WT           | /                 | /                |
| 25         | WT           | /                 | /                |
| 26         | WT           | /                 | /                |
| 27         | WT           | /                 | /                |
| 28         | WT           | /                 | /                |
| 29         | CDH1         | c.1774G>A         | p.A542T          |
| 30         | WT           | /                 | /                |
| 31         | WT           | /                 | /                |
| 32         | MAP2K4       | c.946C>T          | p.Q316*          |
| 33         | TP53         | c.637C>T          | p.R213Ter        |
| 34         | TP53         | c.586C>T          | p.R196Ter        |
| 35         | TP53         | c.584T>C          | p.I195T          |
| 36         | WT           | /                 | /                |
| 37         | TP53         | c.742C>T          | p.R248W          |
| 38         | WT           | /                 | /                |
| 39         | TP53         | c.742C>T/c.574C>T | p.Q192Terp.R248W |

|    |      |          |           |
|----|------|----------|-----------|
| 40 | TP53 | c.637C>T | p.R213Ter |
| 41 | TP53 | c.637C>T | p.R213Ter |

**Table S5.** L1 expression stratified by BC treatment ( $n = 207$ ).

|                                      | Relapse  | No Relapse |             |
|--------------------------------------|----------|------------|-------------|
| Chemotherapy alone ( $n = 50$ )      | $n=29$   | $n=21$     | p-value     |
| ORF1(RQ)                             | 35.18    | 22.23      | <b>0.03</b> |
| ORF2(RQ)                             | 57.32    | 35.55      | <b>0.03</b> |
| Chemo + Hormone therapy ( $n = 80$ ) | $n = 38$ | $n = 52$   | p-value     |
| ORF1(RQ)                             | 16.84    | 11.58      | 0.9         |
| ORF2(RQ)                             | 23.21    | 16.18      | 0.9         |
| Hormone therapy alone ( $n = 31$ )   | $n=13$   | $n=16$     | p-value     |
| ORF1(RQ)                             | 7.9      | 10.74      | 0.4         |
| ORF2(RQ)                             | 13.86    | 17.74      | 0.9         |
| Anti-HER2 therapy ( $n = 46$ )       | $n = 25$ | $n = 21$   | p-value     |
| ORF1(RQ)                             | 23.71    | 11.19      | 0.2         |
| ORF2(RQ)                             | 33.59    | 28.19      | 0.5         |
